# Supplementary material
Source: PubMed Central journal article supplement (PMC3960394)
Supplement: NIHMS543481-supplement-Appendix_A_.pdf [file NIHMS543481-supplement-Appendix_A_.pdf]

## Appendix A

Home location was defined empirically for each study day based on locations provided by the tracking device. Location was not derived from the home address, as geocoding of addresses into latitude and longitude can result in significant error, particularly in rural areas. Additionally, subjects occasionally spent nights away from home, making it necessary to redefine home for each person day. Home location was defined according to the algorithm defined in the table below.

| Location During |                 |               | Home Location Defined As: | Explanation                                                                       |
|-----------------|-----------------|---------------|---------------------------|-----------------------------------------------------------------------------------|
| Previous Night  | Current Morning | Current Night |                           |                                                                                   |
| A               | A               | A             | A                         | Home location constant. Home defined by night location from current day.          |
| A               | B               | A             | A                         | Left home early on current day. Home defined by current day night location.       |
| B               | A               | A             | A                         | Came home late previous night. Home defined by night location from current day.   |
| B               | B               | A             | B                         | Home defined by where previous day ended and current day started.                 |
| A               | B               | C             | Unknown                   | No clear pattern – day excluded for inability to properly classify home location. |

Locations were defined as being the same if they were within 1/3 of a mile, and same locations are designated through the use of the same letter. Different locations, defined as location pairs more than 1/3 of a mile apart, are defined through the use of different letters. Missing locations were considered different from all locations, including other missing locations. Night locations were derived from the median latitude and longitude of locations provided for the time between 10:30 and 11:00 PM, while morning location was taken from a single locate.
